# Supplementary material for: RUNX1/CEBPA Mutation in Acute Myeloid Leukemia Promotes Hypermethylation and Indicates for Demethylation Therapy
Source: MDPI journal article supplement (doi:10.3390/ijms231911413), 2022-09-27
Supplement: s1 [file s1]

## Supplementary Material

| Tumor_Sa<br>mple_Bar<br>code | Hugo_Symb<br>ol | Chromo<br>some | Start_Po<br>sition | End_Po<br>sition | Variant_Clas<br>sification | Variant_T<br>ype | Protein_Chan<br>ge      | i_Tumo<br>rVAF –<br>WU | Possible<br>effect:          | Mutation<br>group | Cytogenetic<br>_abnormality |
|------------------------------|-----------------|----------------|--------------------|------------------|----------------------------|------------------|-------------------------|------------------------|------------------------------|-------------------|-----------------------------|
| TCGA-AB-2808                 | CEBPA           | 19             | 33792368           | 33792369         | In_Frame_In<br>s           | INS              | p.317_318ins<br>M       | 42.86                  | altered<br>target<br>binding | CEBPA             | normal                      |
| TCGA-AB-2808                 | CEBPA           | 19             | 33792368           | 33792369         | In_Frame_In<br>s           | INS              | p.317_318ins<br>M       | 42.86                  |                              | CEBPA             | normal                      |
| TCGA-AB-2808                 | NRAS            | 1              | 115258744          | 115258744        | Missense_M<br>utation      | SNP              | p.G13D                  | 16.85                  |                              | CEBPA             | normal                      |
| TCGA-AB-2839                 | CEBPA           | 19             | 33792294           | 33792294         | Frame_Shift<br>_Del        | DEL              | p.R343fs                | 30.77                  | altered<br>target<br>binding | CEBPA             | normal                      |
| TCGA-AB-2839                 | CEBPA           | 19             | 33792294           | 33792294         | Frame_Shift<br>_Del        | DEL              | p.R343fs                | 30.77                  |                              | CEBPA             | normal                      |
| TCGA-AB-2839                 | DNMT3A          | 2              | 25468133           | 25468133         | Nonsense_<br>Mutation      | SNP              | p.Q515*                 | 55.56                  |                              | CEBPA             | normal                      |
| TCGA-AB-2839                 | NPM1            | 5              | 170837543          | 170837544        | Frame_Shift<br>_Ins        | INS              | p.-287fs                | NA                     |                              | CEBPA             | normal                      |
| TCGA-AB-2839                 | NRAS            | 1              | 115258744          | 115258744        | Missense_M<br>utation      | SNP              | p.G13D                  | 37.63                  |                              | CEBPA             | normal                      |
| TCGA-AB-2839                 | WT1             | 11             | 32417908           | 32417909         | Frame_Shift<br>_Ins        | INS              | p.A170fs                | NA                     |                              | CEBPA             | normal                      |
| TCGA-AB-2845                 | CEBPA           | 19             | 33792390           | 33792391         | In_Frame_In<br>s           | INS              | p.310_311TQ<br>>TKQNPQ  | NA                     | altered<br>target<br>binding | CEBPA             | normal                      |
| TCGA-AB-2845                 | CEBPA           | 19             | 33793190           | 33793191         | Frame_Shift<br>_Del        | DEL              | p.A44fs                 | 0                      |                              | CEBPA             | normal                      |
| TCGA-AB-2845                 | CEBPA           | 19             | 33793191           | 33793191         | Missense_M<br>utation      | SNP              | p.A44P                  | 0                      |                              | CEBPA             | normal                      |
| TCGA-AB-2845                 | CEBPA           | 19             | 33792390           | 33792391         | In_Frame_In<br>s           | INS              | p.310_311TQ<br>>TKQNPQ  | NA                     |                              | CEBPA             | normal                      |
| TCGA-AB-2845                 | CEBPA           | 19             | 33793190           | 33793191         | Frame_Shift<br>_Del        | DEL              | p.A44fs                 | 0                      |                              | CEBPA             | normal                      |
| TCGA-AB-2845                 | CEBPA           | 19             | 33793191           | 33793191         | Missense_M<br>utation      | SNP              | p.A44P                  | 0                      |                              | CEBPA             | normal                      |
| TCGA-AB-2863                 | CEBPA           | 19             | 33792368           | 33792370         | In_Frame_D<br>el           | DEL              | p.T318del               | 25.93                  | altered<br>target<br>binding | CEBPA             | 8                           |
| TCGA-AB-2863                 | CEBPA           | 19             | 33792368           | 33792370         | In_Frame_D<br>el           | DEL              | p.T318del               | 25.93                  |                              | CEBPA             | 8                           |
| TCGA-AB-2863                 | DNMT3A          | 2              | 25457242           | 25457242         | Missense_M<br>utation      | SNP              | p.R882H                 | 47.34                  |                              | CEBPA             | 8                           |
| TCGA-AB-2874                 | CEBPA           | 19             | 33792423           | 33792423         | Missense_M<br>utation      | SNP              | p.R300C                 | 41.96                  | altered<br>target<br>binding | CEBPA             | del(7q) / 7q-               |
| TCGA-AB-2874                 | CEBPA           | 19             | 33792423           | 33792423         | Missense_M<br>utation      | SNP              | p.R300C                 | 41.96                  |                              | CEBPA             | del(7q) / 7q-               |
| TCGA-AB-2874                 | WT1             | 11             | 32413566           | 32413566         | Missense_M<br>utation      | SNP              | p.R250W                 | 26.9                   |                              | CEBPA             | del(7q) / 7q-               |
| TCGA-AB-2880                 | CEBPA           | 19             | 33792991           | 33792992         | Frame_Shift<br>_Ins        | INS              | p.G110fs                | 0                      |                              | CEBPA             | normal                      |
| TCGA-AB-2880                 | CEBPA           | 19             | 33792991           | 33792992         | Frame_Shift<br>_Ins        | INS              | p.G110fs                | 0                      |                              | CEBPA             | normal                      |
| TCGA-AB-2880                 | FLT3            | 13             | 28608251           | 28608252         | In_Frame_In<br>s           | INS              | p.601_602ins<br>REYEYDL | NA                     |                              | CEBPA             | normal                      |
| TCGA-AB-2900                 | CEBPA           | 19             | 33792464           | 33792465         | Frame_Shift<br>_Ins        | INS              | p.R286fs                | 32.61                  | altered<br>target<br>binding | CEBPA             | normal                      |

|              |        |    |               |               |                       |     |                     |       |                                        |       |                                       |
|--------------|--------|----|---------------|---------------|-----------------------|-----|---------------------|-------|----------------------------------------|-------|---------------------------------------|
| TCGA-AB-2900 | CEBPA  | 19 | 3379246<br>4  | 3379246<br>5  | Frame_Shift<br>Ins    | INS | p.R286fs            | 32.61 |                                        | CEBPA | normal                                |
| TCGA-AB-2900 | FLT3   | 13 | 2859264<br>2  | 2859264<br>2  | Missense_M<br>utation | SNP | p.D835Y             | 37.5  |                                        | CEBPA | normal                                |
| TCGA-AB-2900 | NPM1   | 5  | 1708375<br>47 | 1708375<br>48 | Frame_Shift<br>Ins    | INS | p.WQ288fs           | NA    |                                        | CEBPA | normal                                |
| TCGA-AB-2940 | CEBPA  | 19 | 3379239<br>5  | 3379239<br>6  | In_Frame_In<br>s      | INS | p.308_309ins<br>V   | 42.11 | altered<br>target<br>binding           | CEBPA | normal                                |
| TCGA-AB-2940 | CEBPA  | 19 | 3379325<br>3  | 3379325<br>3  | Frame_Shift<br>Del    | DEL | p.P23fs             | 0     |                                        | CEBPA | normal                                |
| TCGA-AB-2940 | CEBPA  | 19 | 3379239<br>5  | 3379239<br>6  | In_Frame_In<br>s      | INS | p.308_309ins<br>V   | 42.11 |                                        | CEBPA | normal                                |
| TCGA-AB-2940 | CEBPA  | 19 | 3379325<br>3  | 3379325<br>3  | Frame_Shift<br>Del    | DEL | p.P23fs             | 0     |                                        | CEBPA | normal                                |
| TCGA-AB-2952 | CEBPA  | 19 | 3379289<br>5  | 3379289<br>6  | Frame_Shift<br>_Del   | DEL | p.R142fs            | 0     |                                        | CEBPA | complex - >= 3 distinct abnormalities |
| TCGA-AB-2952 | CEBPA  | 19 | 3379289<br>5  | 3379289<br>6  | Frame_Shift<br>_Del   | DEL | p.R142fs            | 0     |                                        | CEBPA | complex - >= 3 distinct abnormalities |
| TCGA-AB-2952 | NRAS   | 1  | 1152587<br>47 | 1152587<br>47 | Missense_M<br>utation | SNP | p.G12D              | 11.55 |                                        | CEBPA | complex - >= 3 distinct abnormalities |
| TCGA-AB-2955 | CEBPA  | 19 | 3379240<br>4  | 3379240<br>5  | In_Frame_In<br>s      | INS | p.305_306ins<br>Q   | 50    | altered<br>target<br>binding           | CEBPA | normal                                |
| TCGA-AB-2955 | CEBPA  | 19 | 3379318<br>4  | 3379318<br>4  | Frame_Shift<br>Del    | DEL | p.P46fs             | 0     |                                        | CEBPA | normal                                |
| TCGA-AB-2955 | CEBPA  | 19 | 3379240<br>4  | 3379240<br>5  | In_Frame_In<br>s      | INS | p.305_306ins<br>Q   | 50    |                                        | CEBPA | normal                                |
| TCGA-AB-2955 | CEBPA  | 19 | 3379318<br>4  | 3379318<br>4  | Frame_Shift<br>Del    | DEL | p.P46fs             | 0     |                                        | CEBPA | normal                                |
| TCGA-AB-2955 | DNMT3A | 2  | 2545724<br>2  | 2545724<br>2  | Missense_M<br>utation | SNP | p.R882H             | 40    |                                        | CEBPA | normal                                |
| TCGA-AB-2979 | CEBPA  | 19 | 3379239<br>5  | 3379240<br>0  | In_Frame_D<br>el      | DEL | p.307_309NV<br>E>K  | NA    | altered<br>target<br>binding           | CEBPA | normal                                |
| TCGA-AB-2979 | CEBPA  | 19 | 3379311<br>9  | 3379312<br>0  | Frame_Shift<br>Del    | DEL | p.l68fs             | 42.03 |                                        | CEBPA | normal                                |
| TCGA-AB-2979 | CEBPA  | 19 | 3379239<br>5  | 3379240<br>0  | In_Frame_D<br>el      | DEL | p.307_309NV<br>E>K  | NA    |                                        | CEBPA | normal                                |
| TCGA-AB-2979 | CEBPA  | 19 | 3379311<br>9  | 3379312<br>0  | Frame_Shift<br>Del    | DEL | p.l68fs             | 42.03 |                                        | CEBPA | normal                                |
| TCGA-AB-3000 | CEBPA  | 19 | 3379239<br>0  | 3379239<br>1  | In_Frame_In<br>s      | INS | p.310_311TQ<br>>TWQ | 40.16 | altered<br>target<br>binding           | CEBPA | normal                                |
| TCGA-AB-3000 | CEBPA  | 19 | 3379314<br>6  | 3379314<br>6  | Nonsense_<br>Mutation | SNP | p.E59*              | 0     |                                        | CEBPA | normal                                |
| TCGA-AB-3000 | CEBPA  | 19 | 3379239<br>0  | 3379239<br>1  | In_Frame_In<br>s      | INS | p.310_311TQ<br>>TWQ | 40.16 |                                        | CEBPA | normal                                |
| TCGA-AB-3000 | CEBPA  | 19 | 3379314<br>6  | 3379314<br>6  | Nonsense_<br>Mutation | SNP | p.E59*              | 0     |                                        | CEBPA | normal                                |
| TCGA-AB-3008 | CEBPA  | 19 | 3379240<br>8  | 3379240<br>9  | In_Frame_In<br>s      | INS | p.304_305KQ<br>>KLQ | 25.61 | altered<br>target<br>binding           | CEBPA | normal                                |
| TCGA-AB-3008 | CEBPA  | 19 | 3379240<br>8  | 3379240<br>9  | In_Frame_In<br>s      | INS | p.304_305KQ<br>>KLQ | 25.61 |                                        | CEBPA | normal                                |
| TCGA-AB-2805 | RUNX1  | 21 | 3623178<br>3  | 3623178<br>3  | Nonsense_<br>Mutation | SNP | p.R174*             | 39.69 | strongly<br>reduced<br>DNA<br>binding, | RUNX1 | normal                                |

|              |        |    |         |         |                   |     |                  |       |                                                                       |                                         |        |  |
|--------------|--------|----|---------|---------|-------------------|-----|------------------|-------|-----------------------------------------------------------------------|-----------------------------------------|--------|--|
|              |        |    |         |         |                   |     |                  |       |                                                                       | loss of interaction with other proteins |        |  |
| TCGA-AB-2805 | RUNX1  | 21 | 3625293 | 3625294 | Frame_Shift_Ins   | INS | p.S114fs         | 34.69 |                                                                       | RUNX1                                   | normal |  |
| TCGA-AB-2805 | IDH2   | 15 | 9063193 | 9063193 | Missense_Mutation | SNP | p.R140Q          | 42.68 |                                                                       | RUNX1                                   | normal |  |
| TCGA-AB-2807 | RUNX1  | 21 | 3625285 | 3625286 | In_Frame_Del      | DEL | p.SG140del       | NA    | altered DNA binding                                                   | RUNX1                                   | NA     |  |
| TCGA-AB-2807 | ASXL1  | 20 | 3102272 | 3102272 | Frame_Shift_Del   | DEL | p.G738fs         | 50.41 |                                                                       | RUNX1                                   | NA     |  |
| TCGA-AB-2807 | IDH2   | 15 | 9063193 | 9063193 | Missense_Mutation | SNP | p.R140Q          | 45.81 |                                                                       | RUNX1                                   | NA     |  |
| TCGA-AB-2821 | RUNX1  | 21 | 3625299 | 3625299 | Frame_Shift_Ins   | INS | p.D96fs          | 29.9  |                                                                       | RUNX1                                   | normal |  |
| TCGA-AB-2821 | ASXL1  | 20 | 3102271 | 3102271 | Nonsense_Mutation | SNP | p.Q733*          | 28.95 |                                                                       | RUNX1                                   | normal |  |
| TCGA-AB-2821 | IDH2   | 15 | 9063183 | 9063183 | Missense_Mutation | SNP | p.R172K          | 11.11 |                                                                       | RUNX1                                   | normal |  |
| TCGA-AB-2821 | U2AF1  | 21 | 4451477 | 4451477 | Missense_Mutation | SNP | p.Q157P          | 43.55 |                                                                       | RUNX1                                   | normal |  |
| TCGA-AB-2850 | RUNX1  | 21 | 3616459 | 3616461 | Frame_Shift_Del   | DEL | p.GGERSPP R393fs | NA    |                                                                       | RUNX1                                   | normal |  |
| TCGA-AB-2850 | IDH2   | 15 | 9063193 | 9063193 | Missense_Mutation | SNP | p.R140Q          | 38.14 |                                                                       | RUNX1                                   | normal |  |
| TCGA-AB-2850 | STAG2  | 23 | 1232246 | 1232246 | Splice_Site       | SNP |                  | 47.37 |                                                                       | RUNX1                                   | normal |  |
| TCGA-AB-2865 | RUNX1  | 21 | 3623179 | 3623179 | Missense_Mutation | SNP | p.D171N          | 60.62 | strongly reduced DNA binding                                          | RUNX1                                   | NA     |  |
| TCGA-AB-2865 | RUNX1  | 21 | 3625294 | 3625294 | Missense_Mutation | SNP | p.S114L          | 25.88 |                                                                       | RUNX1                                   | NA     |  |
| TCGA-AB-2865 | DIS3   | 13 | 7334599 | 7334599 | Missense_Mutation | SNP | p.R514K          | 40.49 |                                                                       | RUNX1                                   | NA     |  |
| TCGA-AB-2865 | TET2   | 4  | 1061579 | 1061579 | Nonsense_Mutation | SNP | p.Q947*          | 38.98 |                                                                       | RUNX1                                   | NA     |  |
| TCGA-AB-2865 | TET2   | 4  | 1061938 | 1061938 | Frame_Shift_Ins   | INS | p.K1422fs        | 32.46 |                                                                       | RUNX1                                   | NA     |  |
| TCGA-AB-2865 | TET2   | 4  | 1061938 | 1061938 | Frame_Shift_Ins   | INS | p.K1422fs        | 0     |                                                                       | RUNX1                                   | NA     |  |
| TCGA-AB-2890 | RUNX1  | 21 | 3623178 | 3623178 | Nonsense_Mutation | SNP | p.R174*          | 24    | strongly reduced DNA binding, loss of interaction with other proteins | RUNX1                                   | normal |  |
| TCGA-AB-2899 | RUNX1  | 21 | 3625287 | 3625287 | Missense_Mutation | SNP | p.R135G          | 66.67 | strongly reduced DNA binding                                          | RUNX1                                   | normal |  |
| TCGA-AB-2899 | TCEAL6 | 23 | 1013961 | 1013961 | Missense_Mutation | SNP | p.E45K           | 42.64 |                                                                       | RUNX1                                   | normal |  |
| TCGA-AB-2907 | RUNX1  | 21 | 3623187 | 3623187 | Splice_Site       | SNP |                  | 44.44 |                                                                       | RUNX1                                   | normal |  |
| TCGA-AB-2907 | ASXL1  | 20 | 3102475 | 3102475 | Nonsense_Mutation | SNP | p.R1415*         | 35.19 |                                                                       | RUNX1                                   | normal |  |
| TCGA-AB-2907 | IDH2   | 15 | 9063193 | 9063193 | Missense_Mutation | SNP | p.R140Q          | 30.99 |                                                                       | RUNX1                                   | normal |  |

|              |        |    |           |           |                   |     |           |             |                                                                       |       |        |
|--------------|--------|----|-----------|-----------|-------------------|-----|-----------|-------------|-----------------------------------------------------------------------|-------|--------|
| TCGA-AB-2907 | TTN    | 2  | 179647547 | 179647547 | Missense_Mutation | SNP | p.Y1029C  | 27.95       |                                                                       | RUNX1 | normal |
| TCGA-AB-2912 | RUNX1  | 21 | 36252877  | 36252877  | Missense_Mutation | SNP | p.R135K   | 37.93       | altered DNA binding                                                   | RUNX1 | 8      |
| TCGA-AB-2912 | PHF6   | 23 | 133511712 | 133511713 | Frame_Shift_Ins   | INS | p.N23fs   | 64.58       |                                                                       | RUNX1 | 8      |
| TCGA-AB-2912 | U2AF1  | 21 | 44524456  | 44524456  | Missense_Mutation | SNP | p.S34F    | 36.05       |                                                                       | RUNX1 | 8      |
| TCGA-AB-2927 | RUNX1  | 21 | 36231783  | 36231783  | Nonsense_Mutation | SNP | p.R174*   | 33.33       | strongly reduced DNA binding, loss of interaction with other proteins | RUNX1 | normal |
| TCGA-AB-2927 | RUNX1  | 21 | 36252876  | 36252876  | Missense_Mutation | SNP | p.R135S   | 42.86       | strongly reduced DNA binding                                          | RUNX1 | normal |
| TCGA-AB-2927 | ASXL1  | 20 | 31022234  | 31022234  | Splice_Site       | SNP |           | 33.9        |                                                                       | RUNX1 | normal |
| TCGA-AB-2927 | DIS3   | 13 | 73337717  | 73337717  | Missense_Mutation | SNP | p.M667V   | 37.04       |                                                                       | RUNX1 | normal |
| TCGA-AB-2927 | TTN    | 2  | 179484779 | 179484779 | Missense_Mutation | SNP | p.D13814E | 32.04       |                                                                       | RUNX1 | normal |
| TCGA-AB-2933 | RUNX1  | 21 | 36252878  | 36252878  | Missense_Mutation | SNP | p.R135G   | 58.33       | strongly reduced DNA binding                                          | RUNX1 | normal |
| TCGA-AB-2936 | RUNX1  | 21 | 36171607  | 36171607  | Nonsense_Mutation | SNP | p.R293*   | 26.83       |                                                                       | RUNX1 | normal |
| TCGA-AB-2936 | IDH2   | 15 | 90631934  | 90631934  | Missense_Mutation | SNP | p.R140Q   | 39.13       |                                                                       | RUNX1 | normal |
| TCGA-AB-2936 | TCEAL6 | 23 | 101396081 | 101396081 | Nonsense_Mutation | SNP | p.E75*    | 42.36       |                                                                       | RUNX1 | normal |
| TCGA-AB-2959 | RUNX1  | 21 | 36231782  | 36231782  | Missense_Mutation | SNP | p.R174Q   | 86.96       | strongly reduced DNA binding, naturally occurs in FPDMM               | RUNX1 | normal |
| TCGA-AB-2959 | IDH2   | 15 | 90631934  | 90631934  | Missense_Mutation | SNP | p.R140Q   | 42.11       |                                                                       | RUNX1 | normal |
| TCGA-AB-2959 | PHF6   | 23 | 133547852 | 133547852 | Splice_Site       | SNP |           | 64.71       |                                                                       | RUNX1 | normal |
| TCGA-AB-2970 | RUNX1  | 21 | 36259153  | 36259153  | Missense_Mutation | SNP | p.P86L    | 90.41769042 | strongly reduced DNA binding                                          | RUNX1 | normal |
| TCGA-AB-2970 | WT1    | 11 | 32413611  | 32413611  | Splice_Site       | SNP |           | 43.38       |                                                                       | RUNX1 | normal |
| TCGA-AB-2978 | RUNX1  | 21 | 36231783  | 36231783  | Nonsense_Mutation | SNP | p.R174*   | 46.81       | strongly reduced DNA binding, loss of interaction with other proteins | RUNX1 | normal |

|              |       |    |           |           |                   |     |                   |                  |                     |       |        |
|--------------|-------|----|-----------|-----------|-------------------|-----|-------------------|------------------|---------------------|-------|--------|
| TCGA-AB-2978 | STAG2 | 23 | 123220476 | 123220476 | Nonsense_Mutation | SNP | p.R1045*          | 20.33            |                     | RUNX1 | normal |
| TCGA-AB-2978 | TET2  | 4  | 106183007 | 106183008 | Splice_Site       | INS |                   | 0                |                     | RUNX1 | normal |
| TCGA-AB-2978 | TET2  | 4  | 106196213 | 106196213 | Nonsense_Mutation | SNP | p.R1516*          | 40.79            |                     | RUNX1 | normal |
| TCGA-AB-3009 | RUNX1 | 21 | 36252869  | 36252870  | Frame_Shift_Ins   | INS | p.G138fs          | 38.05668016      | altered DNA binding | RUNX1 | normal |
| TCGA-AB-3009 | PHF6  | 23 | 133551224 | 133551224 | Missense_Mutation | SNP | p.G287V           | 93.491124260355  |                     | RUNX1 | normal |
| TCGA-AB-3009 | TTN   | 2  | 179472757 | 179472758 | In_Frame_Ins      | INS | p.15945_15945I>SL | 40.95            |                     | RUNX1 | normal |
| TCGA-AB-3009 | WT1   | 11 | 32417909  | 32417910  | Frame_Shift_Ins   | INS | p.-169fs          | 41.0788381742739 |                     | RUNX1 | normal |

Supplemental Table S1. Mutations type description in each of the studied patient

## ChIP-qPCR

The qPCR was performed with 5x qPCRMix-HS SYBR master mix (Evrogen, Moscow) and primers, specific to the region surrounding CpG of interest.

|           |                        |
|-----------|------------------------|
| OSBPL5-1F | GCGGGAGGACAGTTATTCCTGA |
| OSBPL5-1R | CTCGGGAGTCGTGCCAACTT   |
| BIK2-1F   | GGGCTCTGGCCTCCTAAATG   |
| BIK2-1R   | GCTCCCAGACCACAGTAAACA  |
| BIK2-2F   | AATGAGCCACTCGTGGGGTA   |
| BIK2-2R   | AGACCACAGTAAACACTGCG   |

Supplemental Table S2. Primers overlapping the CpG associated with OSBPL5 and BIK genes.

## Cell types

OCI-AML5 and OCI-AML2 cell lines (DSMZ cat. No.:ACC 247 and ACC 99, correspondingly) were used to represent RUNX1-mutated and RUNX1-wild type AML respectively. AML cell lines with RUNX1 mutations OCI-AML5 (c.361\_362insTGCTA(The Institute for Cancer Research, UK n.d.) ) and Mono-Mac1 (c.320C>T ("MONOMAC1" n.d.) ) were used in a treatment experiment to represent cells with RUNX1 mutation.

## Supplementary figures

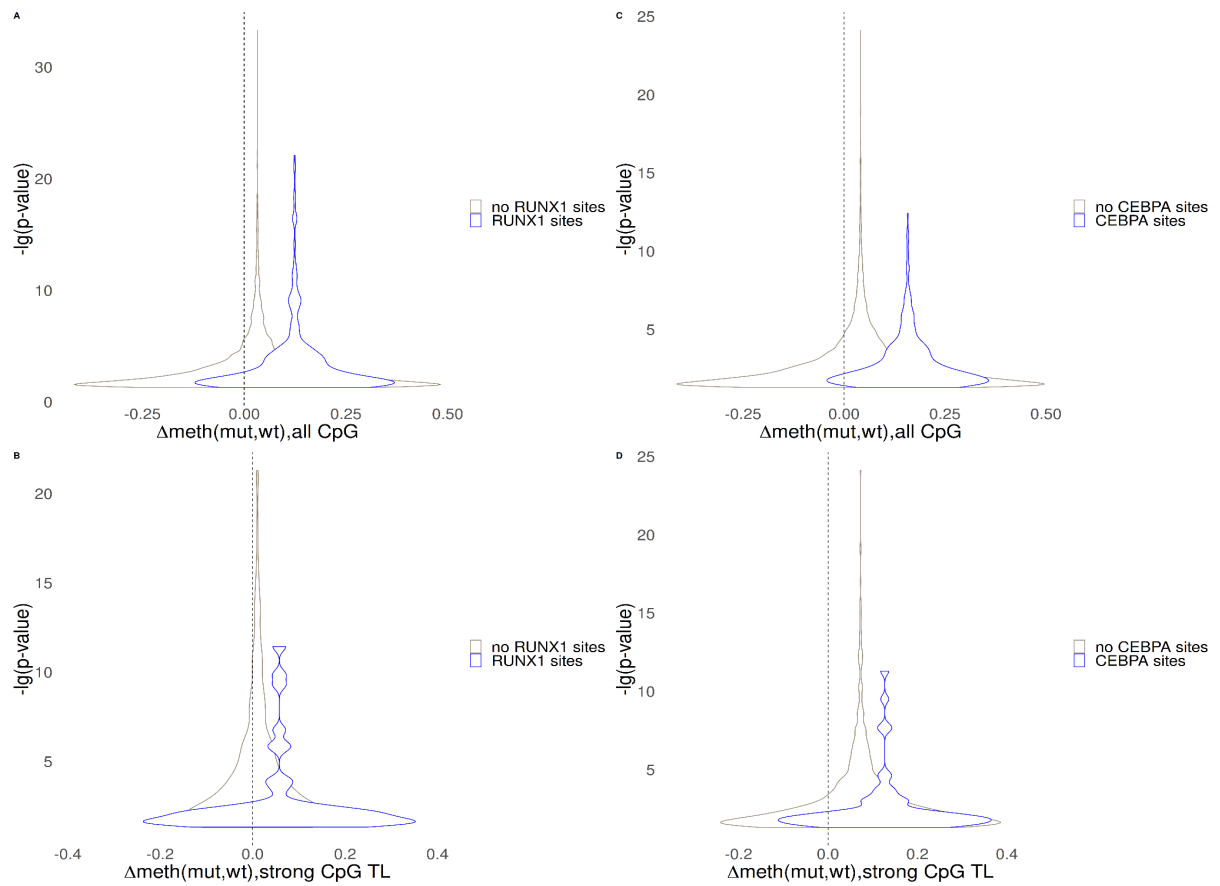

Supplemental Figure S1. Difference in the average levels of DNA methylation between AML patients with and without RUNX1/CEBPA mutation ( $\Delta\text{meth}$ ). Differentially methylated CpG in close proximity to TFBS and the rest of the differentially methylated CpGs are represented as purple and grey violins respectively.

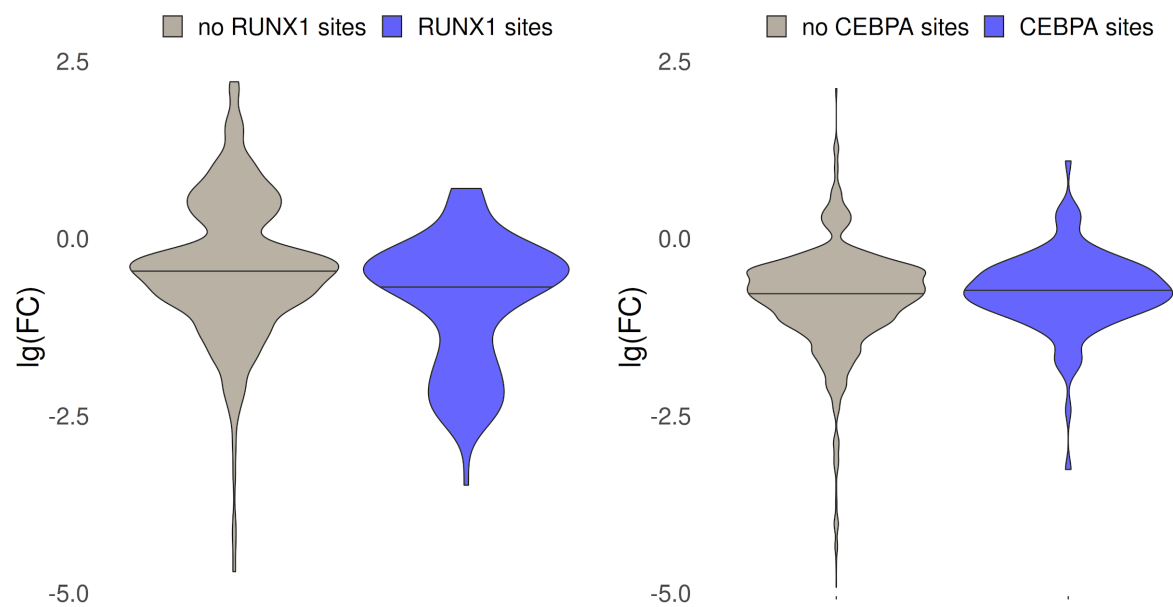

Supplemental Figure S2. Changes in expression of the genes regulated by RUNX1/CEBPA in AML patients with a mutation in a corresponding TF compared to patients without a mutation.

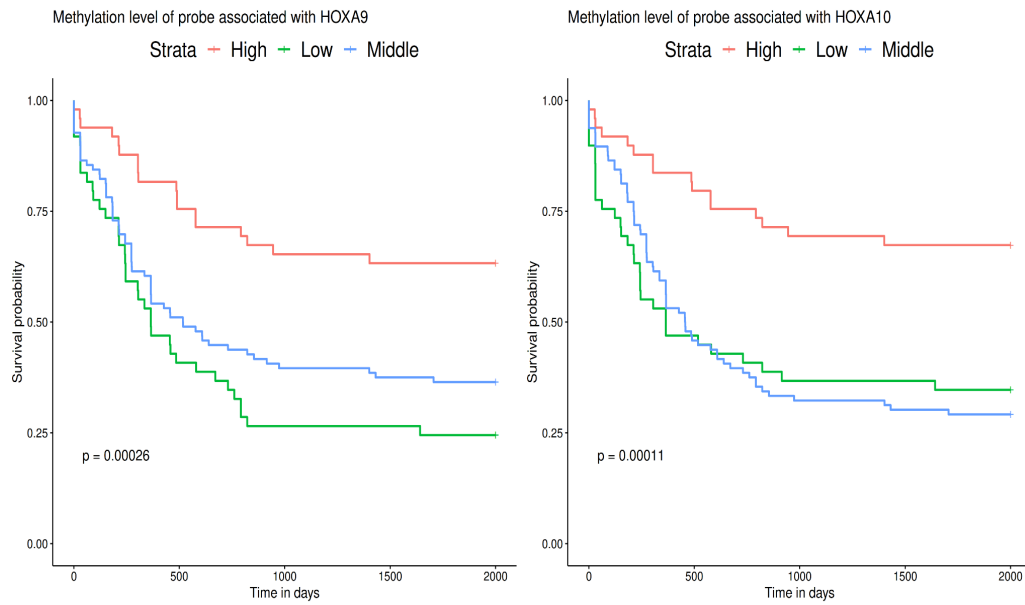

Supplemental Figure S3. Survival rates in patients with different levels of DNA methylation in HOXA9 and HOXA10 genes.

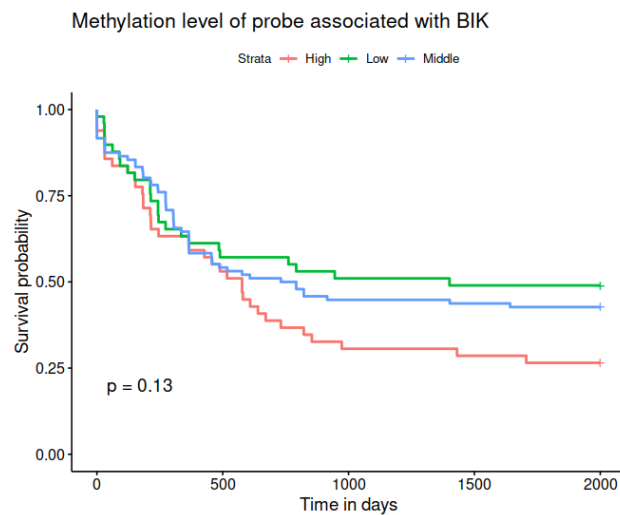

Supplemental Figure S4. Survival rates in patients with different levels of DNA methylation in BIK gene.

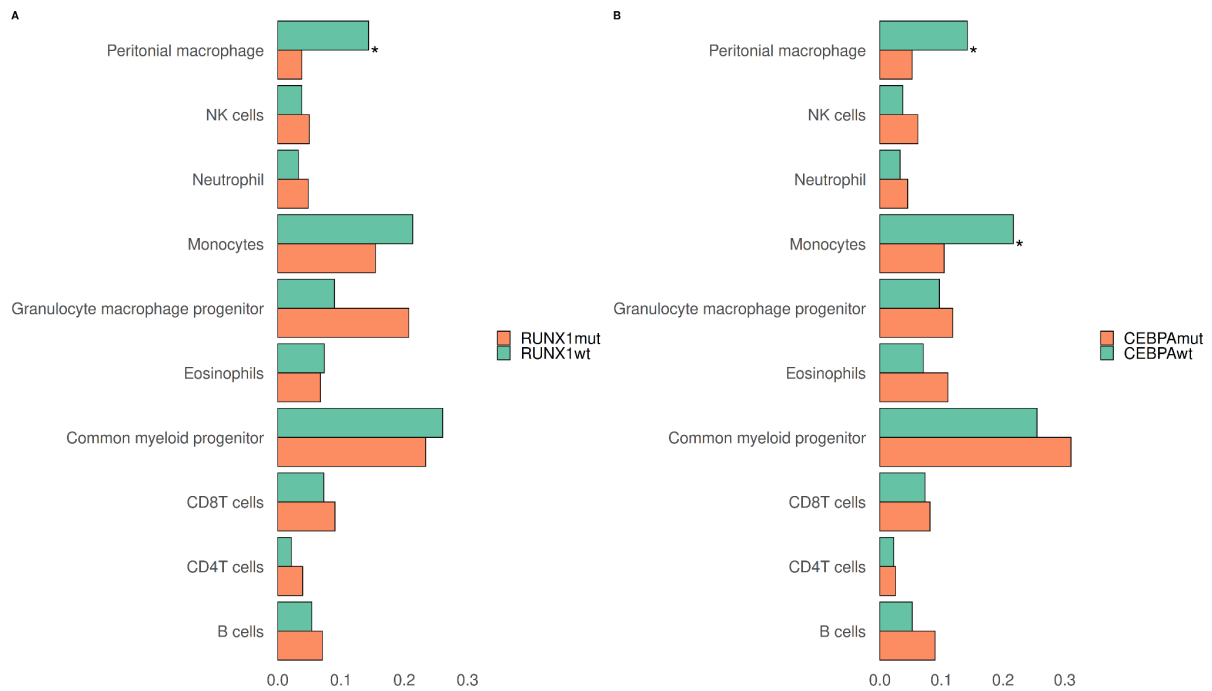

Supplemental Figure S5. (A,B) Fractions of the deconvoluted cell types in AML patients with and without RUNX1/CEBPA mutation. Significantly different cell types (p-value <0.05) are marked with star(\*).

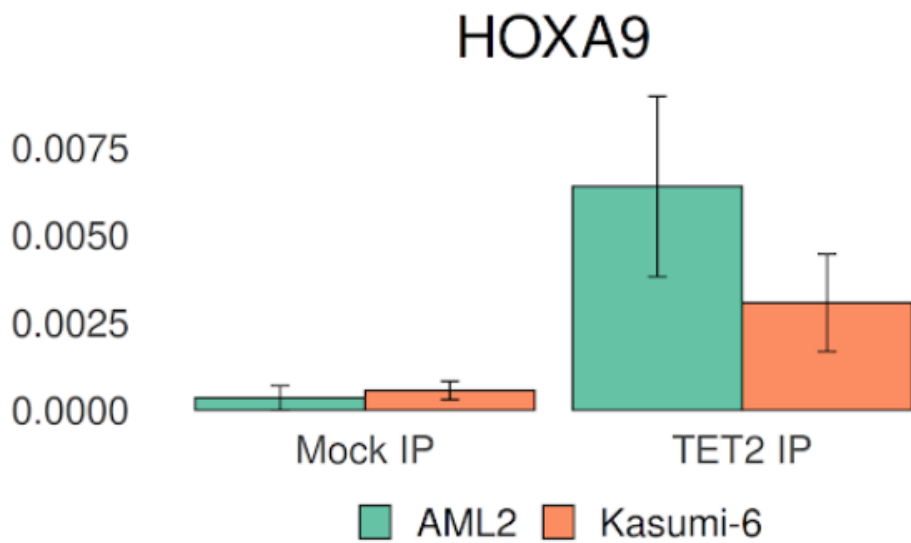

Supplementary Figure S6. TET2 binding in HOXA9 gene in OCI-AML2 cells (wt CEBPA) and in Kasumi-6 (mutated CEBPA). A mock IP was used as a background.

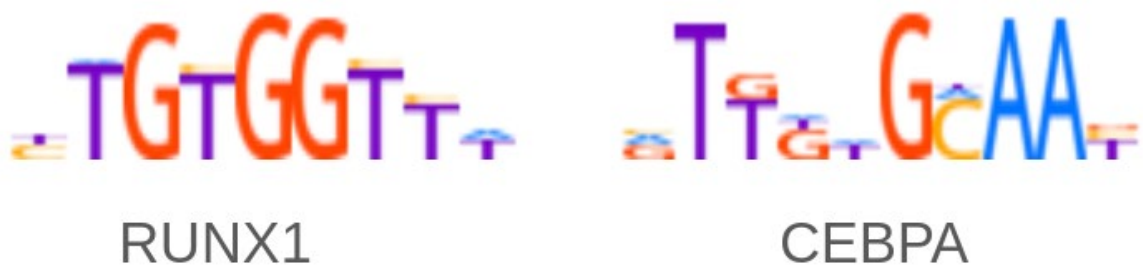

Supplementary Figure S7. RUNX1 and CEBPA motifs. (Kulakovskiy et al. 2018).



| Gene name | CpG ID     | Chromosome | Position  | Gene expression, fold change<br>RUNX1wt/<br>RUNX1mut | Gene expression, FDR | Delta DNA methylation<br>(RUNX1mut-<br>RUNX1wt) | DNA methylation, FDR |
|-----------|------------|------------|-----------|------------------------------------------------------|----------------------|-------------------------------------------------|----------------------|
| OSBPL5    | cg14183540 | 11         | 3175007   | 2.594                                                | 0.000                | 0.377                                           | 0.000                |
| BIK       | cg05251389 | 22         | 43525330  | 4.796                                                | 0.000                | 0.320                                           | 0.000                |
| C10orf91  | cg15834395 | 10         | 134261413 | 2.164                                                | 0.000                | 0.271                                           | 0.004                |
| C16orf93  | cg01688936 | 16         | 30770794  | 2.120                                                | 0.000                | 0.265                                           | 0.027                |
| VSTM1     | cg01718139 | 19         | 54566838  | 2.330                                                | 0.009                | 0.255                                           | 0.004                |
| ZBTB16    | cg17518710 | 11         | 113954170 | 2.110                                                | 0.031                | 0.254                                           | 0.044                |
| C20orf197 | cg25724895 | 20         | 58630390  | 2.330                                                | 0.005                | 0.247                                           | 0.026                |
| HOXB3     | cg19710451 | 17         | 46654202  | 2.248                                                | 0.001                | 0.240                                           | 0.026                |
| TNFRSF10C | cg18545076 | 8          | 22960177  | 2.236                                                | 0.016                | 0.225                                           | 0.015                |
| LGALS3BP  | cg04927537 | 17         | 76976091  | 7.399                                                | 0.000                | 0.217                                           | 0.004                |
| KRT18     | cg14212748 | 12         | 53343703  | 4.981                                                | 0.000                | 0.191                                           | 0.021                |
| CACNA2D4  | cg10665892 | 12         | 1921115   | 2.415                                                | 0.002                | 0.187                                           | 0.010                |
| LGALS3BP  | cg18749404 | 17         | 76975944  | 7.399                                                | 0.000                | 0.160                                           | 0.000                |

Supplemental Table S3. CpG positions and the corresponding genes that have the most dramatic change in methylation and expression in AML patients with the RUNX1 mutation (RUNX1mut) compared to AML patients with a wild type RUNX1 (RUNX1wt).

| Gene name | CpG ID     | Chromosome | Position  | Gene expression, fold change<br>CEBPAwt/<br>CEBPAmut | Gene expression, FDR | Delta DNA methylation<br>(CEBPAmut-<br>CEBPAwt) | DNA methylation, FDR |
|-----------|------------|------------|-----------|------------------------------------------------------|----------------------|-------------------------------------------------|----------------------|
| HOXA9     | cg12600174 | 7          | 27205230  | 3.243                                                | 0.016                | 0.391                                           | 0.017                |
| PTRF      | cg27576485 | 17         | 40558063  | 3.267                                                | 0.041                | 0.349                                           | 0.018                |
| HOXA10    | cg21172377 | 7          | 27213893  | 3.781                                                | 0.002                | 0.296                                           | 0.019                |
| SCHIP1    | cg19605623 | 3          | 159579349 | 2.727                                                | 0.021                | 0.288                                           | 0.000                |
| PTRF      | cg11669285 | 17         | 40558061  | 3.267                                                | 0.041                | 0.274                                           | 0.022                |
| GPR109B   | cg25190513 | 12         | 123201362 | 2.286                                                | 0.004                | 0.273                                           | 0.010                |
| GPR109B   | cg15545247 | 12         | 123201372 | 2.286                                                | 0.004                | 0.270                                           | 0.007                |

| Gene name | CpG ID     | Chromosome | Position  | Gene expression, fold change CEBPAwt/CEBPAmut | Gene expression, FDR | Delta DNA methylation (CEBPAmut-CEBPAAwt) | DNA methylation, FDR |
|-----------|------------|------------|-----------|-----------------------------------------------|----------------------|-------------------------------------------|----------------------|
| HOXA9     | cg12600174 | 7          | 27205230  | 3.243                                         | 0.016                | 0.391                                     | 0.017                |
| PTRF      | cg27576485 | 17         | 40558063  | 3.267                                         | 0.041                | 0.349                                     | 0.018                |
| HOXA10    | cg21172377 | 7          | 27213893  | 3.781                                         | 0.002                | 0.296                                     | 0.019                |
| SCHIP1    | cg19605623 | 3          | 159579349 | 2.727                                         | 0.021                | 0.288                                     | 0.000                |
| PTRF      | cg11669285 | 17         | 40558061  | 3.267                                         | 0.041                | 0.274                                     | 0.022                |
| GPR109B   | cg25190513 | 12         | 123201362 | 2.286                                         | 0.004                | 0.273                                     | 0.010                |
| ECE1      | cg13086983 | 1          | 21664810  | 2.063                                         | 0.025                | 0.212                                     | 0.040                |
| PI4K2A    | cg00997424 | 10         | 99400181  | 2.225                                         | 0.027                | 0.194                                     | 0.040                |
| MFSD2A    | cg01869896 | 1          | 40420299  | 2.291                                         | 0.031                | 0.192                                     | 0.001                |
| TNS3      | cg07488141 | 7          | 47560215  | 2.585                                         | 0.009                | 0.179                                     | 0.016                |
| FSTL1     | cg21790991 | 3          | 120137480 | 2.414                                         | 0.012                | 0.174                                     | 0.008                |
| LOC283663 | cg16075649 | 15         | 57595298  | 2.063                                         | 0.004                | 0.163                                     | 0.003                |

Supplemental Table S4. CpG positions and the corresponding genes that have the most dramatic change in methylation and expression in AML patients with the CEBPA mutation (CEBPAmut) compared to AML patients with a wild type CEBPA (CEBPAAwt).

Kulakovskiy, Ivan V., Ilya E. Vorontsov, Ivan S. Yevshin, Ruslan N. Sharipov, Alla D. Fedorova, Eugene I. Rumynskiy, Yulia A. Medvedeva, et al. 2018. "HOCOMOCO: Towards a Complete Collection of Transcription Factor Binding Models for Human and Mouse via Large-Scale ChIP-Seq Analysis." *Nucleic Acids Research* 46 (D1): D252–59.

"MONOMAC1." n.d. Accessed April 12, 2021. [https://depmap.org/portal/cell\\_line/ACH-001129?tab=mutation](https://depmap.org/portal/cell_line/ACH-001129?tab=mutation).

The Institute for Cancer Research, UK. n.d. "canSAR Black." The Institute for Cancer Research, UK. Accessed April 12, 2021. <https://cansarblack.icr.ac.uk/cell-line/OCI-AML-5/mutations>.
